# Supplementary material for: Flavonoid Biosynthesis Is Likely More Susceptible to Elevation and Tree Age Than Other Branch Pathways Involved in Phenylpropanoid Biosynthesis in Ginkgo Leaves
Source: Front Plant Sci. 2019 Jul 30;10:983. doi: 10.3389/fpls.2019.00983 (PMC6682722; doi:10.3389/fpls.2019.00983)
Supplement: Supplementary file 5 [file Data_Sheet_3.xls]

## Sheet: Supplementary Table S9
Datasheet S3. The Reporting of Metabolites.
Supplementary Table S9. Metabolite Reporting Checklist.
Level	Aspect	Information	Fill in
general aspect	Type of metabolome analysis	targeted metabolite analysis	-
		non-targeted metabolite class scale profiling	TRUE
		non-targeted metabolome scale profiling	-
		non-targeted finger printing of mass features	-
	Type of quantification	absolute or quantification	relative quantification
	Type of reference samples	chemcially defined	To minimize the error, andrographolide was dissolved in acetonitrile as an internal standard solution with the terminal concentration of 133μM.
		biologically defined	The quality control (QC) samples were prepared by pooling 0.2g powder of each sample.Six QC samples were prepared.
	Type of replication	analytical (same analytical sample preparation)	3
		technological (same biological preparation)	1
		biological (same experimental condition)	3
		full experiment	18
	Type of technology	reference publication	Plant Cell reference style
	Sample preparation	method of sample preparation	chemically non-modified
		method of chromatography/separation	Chromatographic separation was completed on a Shimadzu LC-30AD Series UHPLC system (Shimadzu, Duisburg, Germany) equipped with supplementary SIL-30AC injector and (PAD) SPD-M20A detector. ACQUITY UPLCTM BEH C18 column (100 mm × 2.1 mm, 1.7 μm, Waters, Milford, USA) was attached to the whole analyses at 35℃. A flow rate of 0.3 mL/min was chosen to use while 0.1% formic acid water (A) and acetonitr…
		method of ionization	negative mode ESI electrospray ionization temperature (℃): 500 (ESI-); nebulizer gas pressure (psi): 60 (ESI-); ion spray voltage (KV): 4.5 (ESI-); collision energies (V): 35 (ESI-).
		method of detection	MS, AB SCIEX TripleTOFTM 5600+ system (AB SCIEX Technologies, USA)
metabolite/mass feature	Metabolite	metabolite name	Andrographolide* Naringenin chalcone Pinocembrin Dihydrokaempferol Dihydroquercetin (+)-Catechin (+)-Gallocatechin (-)-Epicatechin Kaempferol Quercetin Myricetin Chrysin Apigenin Luteolin Rutin Isoginkgetin Ginkgetin Robinin Kaempferol-7-O-neohesperidoside Isorhamnetin-3-O-rutinoside Kaempferol 3-O-β-D-rhamninoside Quercetin-3-neohesperidoside-7-rhamnoside Rhamnegin Quercitrin Quercetin 3-β-D-glu…
		metabolite sum formula	C20H30O5 C15H12O5 C15H12O4 C15H12O6 C15H12O7 C15H14O6 C15H14O7 C15H14O6 C15H10O6 C15H10O7 C15H10O8 C15H10O4 C15H10O5 C15H10O6 C27H30O16 C32H22O10 C32H22O10 C33H40O19 C27H30O15 C28H32O16 C33H40O19 C33H40O20 C34H42O20 C21H20O11 C21H20O12 C11H12O5 C11H14O4 C9H8O3 C15H18O8 C10H10O3 C9H8O4 C10H10O4 C9H8O3 C9H8O3 C9H8O2 C20H26O6
		metabolite structure and public source of metabolite identifier	HMDB (http://www.hmdb.ca/), PubChem (https://pubchem.ncbi.nlm.nih.gov/), NIST (https://www.nist.gov/), MassBank (http://www.massbank.jp/) and METLIN (https://metlin.scripps.edu/) databases (Linstrom and Mallard 2001, Horai, Arita et al. 2010, Domingo-Almenara, Montenegro-Burke et al. 2018, Kim, Chen et al. 2018, Wishart, Feunang et al. 2018).
	Identification	identification process	manually supervized
		by authentic mass isotopomer added to one or all biological sample(s)	FALSE
		by authentic reference compound within a co-processed reference mixture	TRUE
		by authentic reference compound previously mapped to the analytical system	FALSE
		reference library	-
		type of mass spectrum	AB SCIEX TripleTOFTM 5600+ system
		by match of molecular mass (single mass fragment)	395.207
		by match of fragments	331.19, 287.20, 303.20, 239.18, 113.03
		by match of fragmentation pattern	287.2020 54.75 331.1918 76.66
		by match of mass spectrum to reference library	-
		type of retention index	-
		by match of retention time (index) to reference library	-
	Quantification	type of quantification	relative
	Validity testing	Recovery testing (chemical analog)	-
		Recovery testing (internally added mass isotopomer)	-
		Recovery testing (mixture of most divergent samples from the experiment)	-
		Test for linear range	-
		Limit of quantification (LOQ)	-
		Limit of detection (LOD)	-

## Sheet: Supplementary Table S10
Supplementary Table S10. Metabolite Identification Details.
UPLC-QTOF-MS metabolites
	A	B	C	D	E	F	G	H	I	J	K	L	M	N	O	P	Q	R	S
1
2	Experiment title: The effect of elevation and tree age on flavonoid biosynthesis in Ginkgo
3	Organism/Plant species: Ginkgo
4	Organ/tissue: leaves
5	Analytical tool: UPLC-MS/MS
6
7	Peak no.- number referenced back to the main text
8	Ret . Time- Retention time, in minutes (difference in Ret.Time between ES(+) and ES(-) modes was less than XX minutes)
9	Putative Name- putative identification of the metabolite
10	Mol. Formula- molecular formula of the metabolite or its FA adduct;
11	Theor. m/z- theoretical monoisotopic mass calculated for the ion (M-H)- , (M+H)+ or (M+FA)-
12	Found m/z- mass detected in the experiment
13	m/z error (ppm)- difference between theoretical and found m/z values in ppm
14	MSMS fragments- fragments, obtained from the ion (M-H)- , (M+H)+ or (M+FA)-
15	MS/MS CE (eV)- collision energy used for fragmentation optional
16	UV/Vis- UV/ Vis absorbance maxima
17	() FA- formic acid adduct
18	(S)- identification confirmed by a standard compound
19	I, II, III- different isomers
20	Identification level (A; B; C; D)- (A) standard or NMR; (B) MS/MS; (C) MSE; (D) MS only
21
22	Peak no.	Ret. Time	Putative metabolite name	Coresponding Metabolite in Literature	Metabolite Class	Mol formula	ES(+) Theor m/z	ES(+) Found m/z	ES(-) Theor m/z	ES(-) Found m/z	m/z error (ppm)	MS/MS ES(+) fragments	MS/MS ES(+) CE (eV)	MS/MS ES(-) fragments	MS/MS ES(-) CE (eV)	UV/Vis	Species detected before	References	Identification level (A-D)
23	1	11.11	Andrographolide		Terpenoids	C20H30O5			395.207	395.206	-4.30154			331.19 287.20 303.20 239.18 113.03	35				A
24	2	12.2	Naringenin chalcone		Chalcone	C15H12O5			271.061	271.06	-2.95136			119.05 151.01 271.05 107.02 118.05	35				B
25	3	15.06	Pinocembrin		Flavonoid	C15H12O4			255.066	255.066	-1.56822			255.07 213.06 201.84 190.96 151.00	35				B
26	4	9.94	Dihydrokaempferol		Flavonoid	C15H12O6			287.056	287.055	-2.43855			125.03 259.06 177.06 152.01 201.06	35				B
27	5	8.94	Dihydroquercetin		Flavonoid	C15H12O7			303.051	303.05	-1.97986			125.03 175.04 217.05 199.04 285.04	35				B
28	6	6.42	(+)-Catechin		Flavonoid	C15H14O6			289.072	289.072	-1.0378			109.03 203.07 123.05 226.06 125.03	35				B
29	7	5.97	(+)-Gallocatechin		Flavonoid	C15H14O7			305.067	305.066	-2.62238			125.03 137.03 219.07 167.04 139.04	35				B
30	8	7.49	(-)-Epicatechin		Flavonoid	C15H14O6			289.072	289.071	-2.42154			203.07 221.08 123.05 109.03 137.02	35				B
31	9	12.39	Kaempferol		Flavonoid	C15H10O6			285.041	285.04	-3.15745			285.04 239.03 214.03 286.04 268.04	35				B
32	10	11.2	Quercetin		Flavonoid	C15H10O7			301.035	301.035	-1.99312			151.01 301.03 121.03 107.02 179.00	35				B
33	11	9.91	Myricetin		Flavonoid	C15H10O8			317.03	317.029	-5.36226			137.03 317.04 179.00 151.00 167.04	35				B
34	12	14.81	Chrysin		Flavonoid	C15H10O4			253.051	253.053	8.29874			253.05 163.00 254.06 187.04 199.84	35				B
35	13	12.17	Apigenin		Flavone	C15H10O5			269.046	269.045	-0.743369			269.05 117.04 151.00 149.02 225.06	35				B
36	14	11.14	Luteolin		Flavone	C15H10O6			285.041	285.04	-2.45579			285.04 133.03 199.04 151.00 217.05	35				B
37	15	8.6	Rutin		Flavonoid glycosides	C27H30O16			609.146	609.144	-4.26827			609.14 301.03 300.03	35				B
38	16	16.25	Isoginkgetin		Biflavonoids	C32H22O10			565.114	565.111	-5.48562			565.11 533.08 389.06 374.04	35				B
39	17	16.5	Ginkgetin		Biflavonoids	C32H22O10			565.114	565.111	-5.66257			565.11 533.09 389.07 374.04	35				B
40	18	10.54	Robinin		Flavonoid	C33H40O19			739.209	739.189	-26.6501			739.18 593.15 284.03 285.04 255.03	35				B
41	19	9.12	Kaempferol-7-O-neohesperidoside		Flavonoid glycosides	C27H30O15			593.151	593.149	-3.37182			593.15 285.04 284.03	35				B
42	20	9.24	Isorhamnetin-3-O-rutinoside		Flavonoid glycosides	C28H32O16			623.162	623.159	-4.17227			623.16 315.05 314.04 300.03 299.02	35				B
43	21	8.41	Kaempferol 3-O-β-D-rhamninoside		Flavonoid glycosides	C33H40O19			739.207	739.207	-0.40584			739.21 284.03 255.03 227.04	35				B
44	22	8.03	Quercetin-3-neohesperidoside-7-rhamnoside		Flavonoid glycosides	C33H40O20			755.204	755.202	-2.38346			755.20 300.03 301.03 271.02	35				B
45	23	8.5	Rhamnegin		Flavonoid glycosides	C34H42O20			769.22	769.218	-2.34003			769.21 314.00	35				B
46	24	9.41	Quercitrin		Flavonoid glycosides	C21H20O11			447.093	447.091	-4.47334			284.03 300.03 301.04 447.09 255.03	35				B
47	25	8.83	Quercetin 3-β-D-glucoside		Flavonoid glycosides	C21H20O12			463.088	463.086	-3.88695			300.03 301.04 463.09 271.02 255.03	35				B
48	26	6.66	Sinapic acid		Hydroxycinnamic acids and derivatives	C11H12O5			223.061	223.061	0			121.03 149.02 193.01 163.03 223.06	35				B
49	27	6.67	Sinapyl alcohol		Phenols	C11H14O4			209.082	209.082	-0.478281			179.03 121.03 151.03 161.02	35				B
50	28	6.75	p-Coumaric acid		Hydroxycinnamic acids and derivatives	C9H8O3			163.04	163.041	3.68008			119.05 117.04 145.90 104.03 162.84	35				B
51	29	6.76	beta-D-Glucosyl-2-hydroxycinnamate		Hydroxycinnamic acids and derivatives	C15H18O8			325.093	325.092	-3.07604			119.05 163.04	35				B
52	30	6.84	Coniferyl aldehyde		Phenols	C10H10O3			177.056	177.056	2.25918			133.03 105.04 121.03 177.02	35				B
53	31	6.88	Caffeic acid		Hydroxycinnamic acids and derivatives	C9H8O4			179.035	179.036	2.79275			135.05 134.04 107.05 117.04	35				B
54	32	7.8	Ferulic acid		Hydroxycinnamic acids and derivatives	C10H10O4			193.051	193.051	2.58999			134.04 133.03 106.05 158.85 178.03	35				B
55	33	8.18	trans-2-Hydroxycinnamate		Hydroxycinnamic acids and derivatives	C9H8O3			163.04	163.041	4.90677			119.05 117.04 145.89 104.03 162.84	35				B
56	34	8.69	cis-2-Hydroxycinnamate (Coumarinate)		Hydroxycinnamic acids and derivatives	C9H8O3			163.04	163.04	1.84004			119.05 117.04 145.89 162.89 104.03	35				B
57	35	15.34	p-Coumaraldehyde		Cinnamaldehydes	C9H8O2			147.045	147.046	7.48069			119.06 117.03 129.04 147.05	35				B
58	36	10.12	Secoisolariciresinol		Lignans	C20H26O6			361.166	361.165	-2.49193			361.17 165.05 346.14 122.04 179.07	35				B
